# Supplementary material for: Interfacing enzymes with silicon nanocrystals through the thiol–ene reaction
Source: Royal Society of Chemistry journal article supplement (doi:10.1039/c8nr05368e), 2018-01-01
Supplement: c8nr05368e1.pdf [file c8nr05368e1.pdf]

# **Interfacing Enzymes with Silicon Nanocrystals through the Thiol-Ene Reaction**

Christopher Jay T. Robidillo,<sup>1,2</sup> Maryam Aghajamali,<sup>1</sup> Angelique Faramus,<sup>1</sup> Regina Sinelnikov,<sup>1</sup>  
Jonathan G.C. Veinot<sup>1\*</sup>

<sup>1</sup>Department of Chemistry, University of Alberta, Edmonton, Alberta T6G 2G2, Canada

<sup>2</sup>Department of Physical Sciences and Mathematics, University of the Philippines Manila, P. Faura Street, Ermita, Manila 1000, Philippines

\*Corresponding author; Email: [jveinot@ualberta.ca](mailto:jveinot@ualberta.ca)

## Supplementary Information

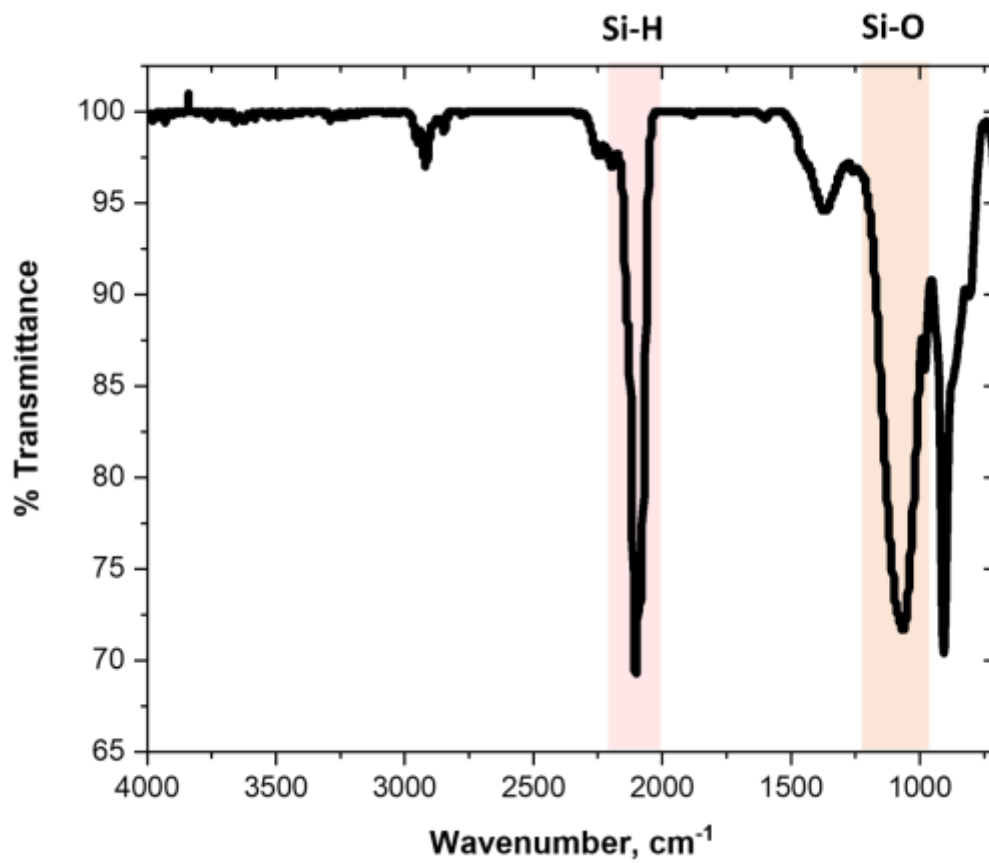

**Figure S1.** FTIR spectrum of hydride-terminated silicon nanocrystals (H-SiNCs).

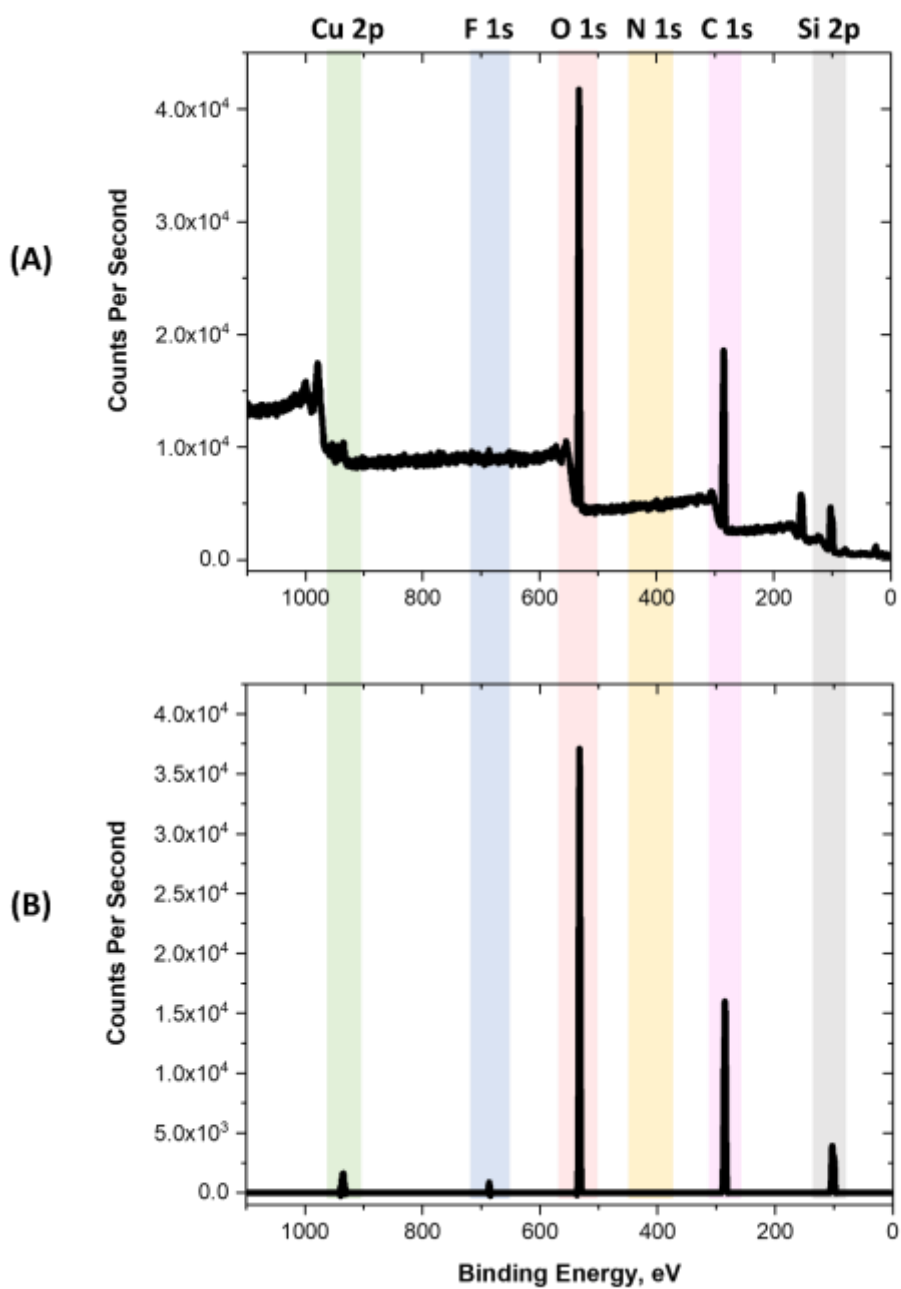

**Figure S2.** Survey XP spectra of *ene*-SiNCs (A) before and (B) after background correction. Notice that the material does not contain nitrogen (*i.e.*, absence of N 1s peak at *ca.* 400 eV), as expected.

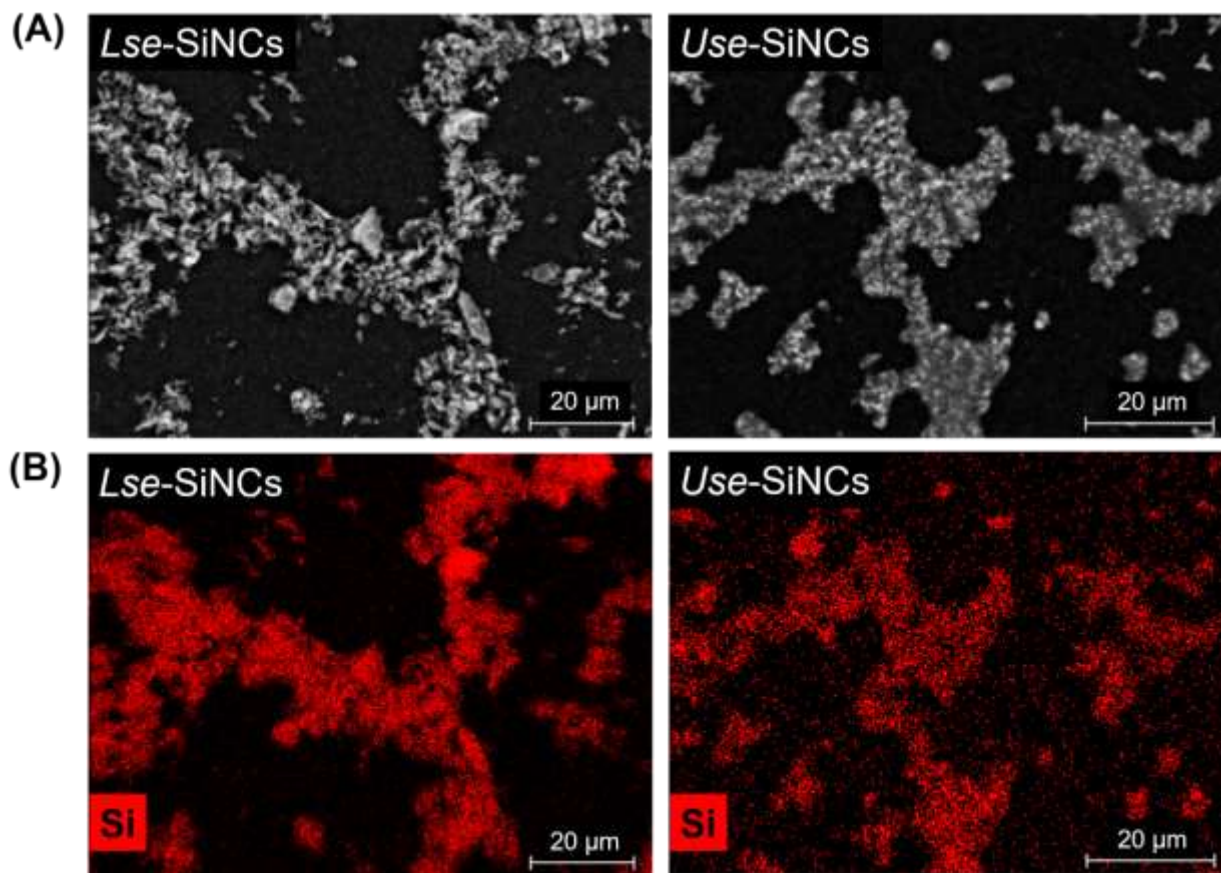

**Figure S3.** (A) BSE/SEM images and (B) EDX mapping of *Lse*-SiNCs and *Use*-SiNCs on a carbon tape. The brighter regions in the BSE/SEM images correspond to *enz*-SiNCs as confirmed by EDX mapping.

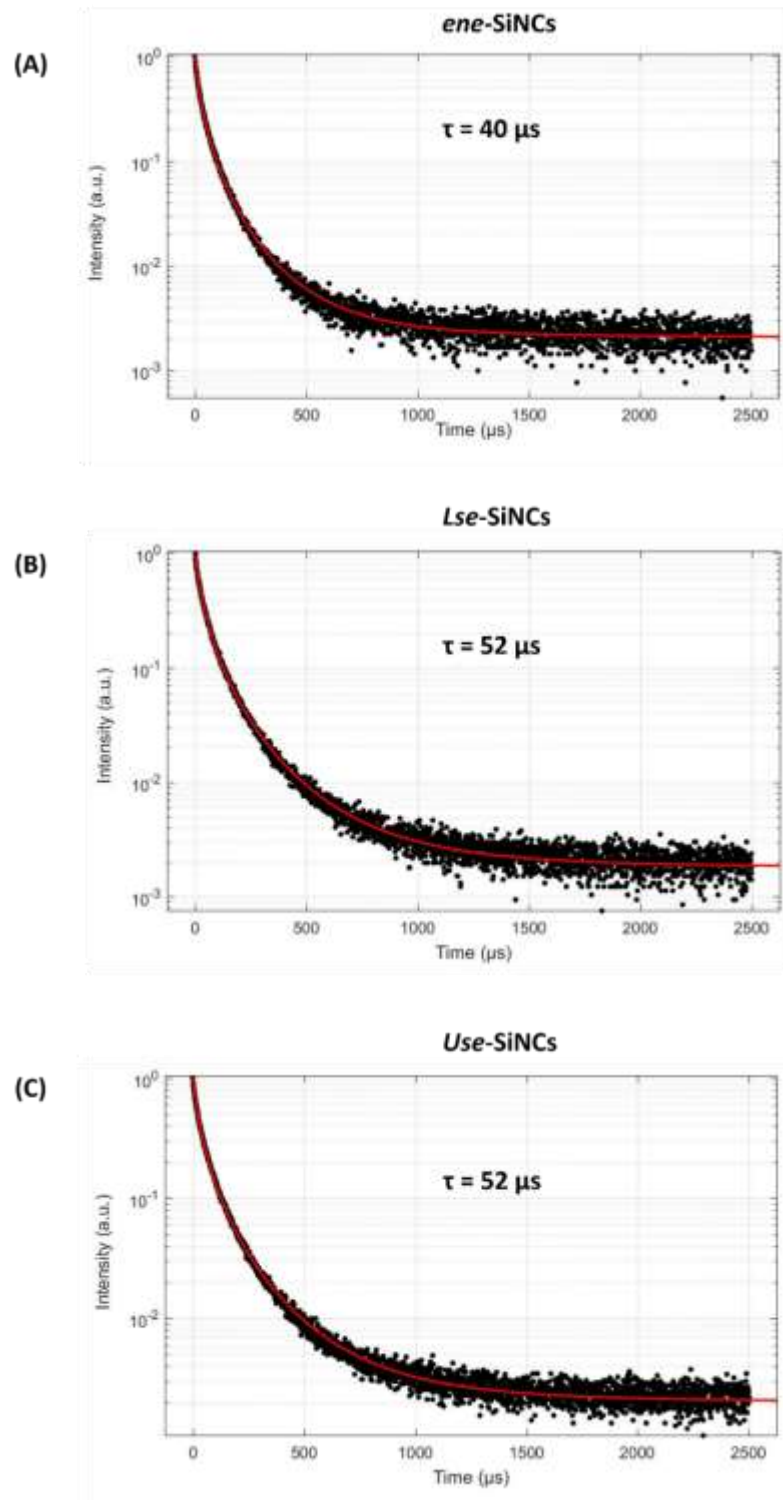

**Figure S4.** Photoluminescence decay plots of (A) *ene*-SiNCs, (B) *Lse*-SiNCs, and (C) *Use*-SiNCs. The lifetimes were calculated using lognormal fitting.

**Table S1.** Absolute quantum yields of *ene*-SiNCs, *Lse*-SiNCs, and *Use*-SiNCs ( $\lambda_{\text{ex}} = 365 \text{ nm}$ ).

| SiNCs             | Absolute Quantum Yield (%) |
|-------------------|----------------------------|
| <i>ene</i> -SiNCs | 39.1 $\pm$ 4.0             |
| <i>Lse</i> -SiNCs | 47.1 $\pm$ 3.5             |
| <i>Use</i> -SiNCs | 43.7 $\pm$ 1.0             |
